# Supplementary material
Source: PubMed Central journal article supplement (PMC2930446)
Supplement: 1008604107_pnas.201008604SI.pdf [file 1008604107_pnas.201008604SI.pdf]

# Supporting Information

Carpenter-Hyland et al. 10.1073/pnas.1008604107

## SI Materials and Methods

**Optical Intrinsic Signal Stimulus Set and Image Preparation.** Our acoustic imaging stimulus was designed to highlight regions of A1 selective for 5- and 13-kHz sounds. Phase-triggered images were recorded over 150 repetitions of a 4-s stimulus. The stimulus used was divided into four 1-s blocks, each consisting of various types of tone pips lasting for 25 ms and having  $\cos^2$  ramps. The first second consisted of 5-kHz tone pips with 200-ms spacing. The next second was a randomly timed bracket of 16 1- to 2.5-kHz tones and 6 7.071- to 9.330-kHz tones. The third second was identical to the first second except that 13-kHz tones were used. The fourth second was again a random bracket of tones, but all were over 26 kHz. This procedure ensured that the 5- and 13-kHz responsive regions of A1 were activated  $180^\circ$  out of phase with each other. All tones were intensity-adjusted to the rat audiogram relative to 8 kHz at 60 dB (1). Data analysis was performed with VK Imaging software and identified regions of A1 in which hemodynamic changes altered red light absorbance in a manner phase-locked to the 5- and 13-kHz tones. Phase was pseudocolored, and shifting allowed the LF and HF regions to be displayed in green and red, respectively. The LF and HF regions of A1 were then overlaid onto the cortical surface image using

GIMP image software (Free Software Foundation), and any necessary adjustments were made in images aligned using vasculature matching between the two images.

**Nose Poke Shaping.** On arrival, animals were pair-housed, allowed a minimum of 3 d to adjust to their colony room, and given free access to standard laboratory chow and water. After this rest period, animals were desensitized to handling for 5 min/d for 3–5 d. Free food access was also removed, and each animal received a minimum of 10 g of food immediately following handling. On the last day of handling, food was restricted to 80%. The following day, animals began shaping for the nose poke task in the operant chamber they would later perform tone detection in. All subsequent food would be gained by working in this operant chamber. Initial hold times were 100 ms, and animals were able to earn a minimum of 220 45-mg food pellets each day. Once the rate of successful holds exceeded unrewarded early withdrawals, the hold time was increased by 100 ms until animals reliably held a poke for 800 ms, which took between 8 and 10 sessions. Animals were then kept at this time, and following the third day of holding for 800 ms, they were introduced to the tone detection task.

1. Heffner HE, Heffner RS, Contos C, Ott T (1994) Audiogram of the hooded Norway rat. *Hear Res* 73:244–247.

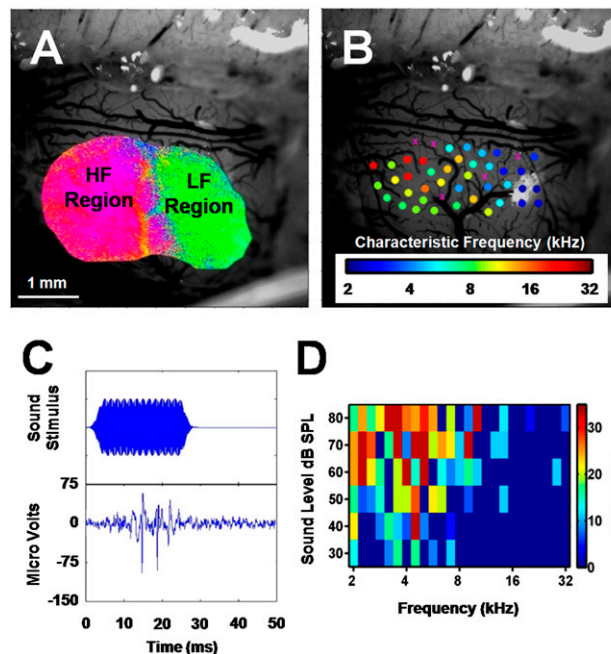

**Fig. S1.** Imaging and microelectrode recording. (A) Optical intrinsic imaging overlaid onto a photograph of the craniotomy and cortical surface. (B) Subsequent penetration map showing distribution and characteristic frequency of sites in the HF and LF regions. Penetrations lacking an auditory response are marked with the letter x. (C) Two-panel plot shows the sound stimulus (above) and spike-filtered voltage response from one A1 site. (D) Action potential onset responses to tone sound stimuli of different intensities and frequencies are shown.
